# Supplementary material
Source: Springer Nature journal article supplement (https://www.springermedizin.de/resource/supplementary/12885_2013_3888_MOESM1_ESM.pdf/9464610)
Supplement: MOESM1 [file 9464610]

A

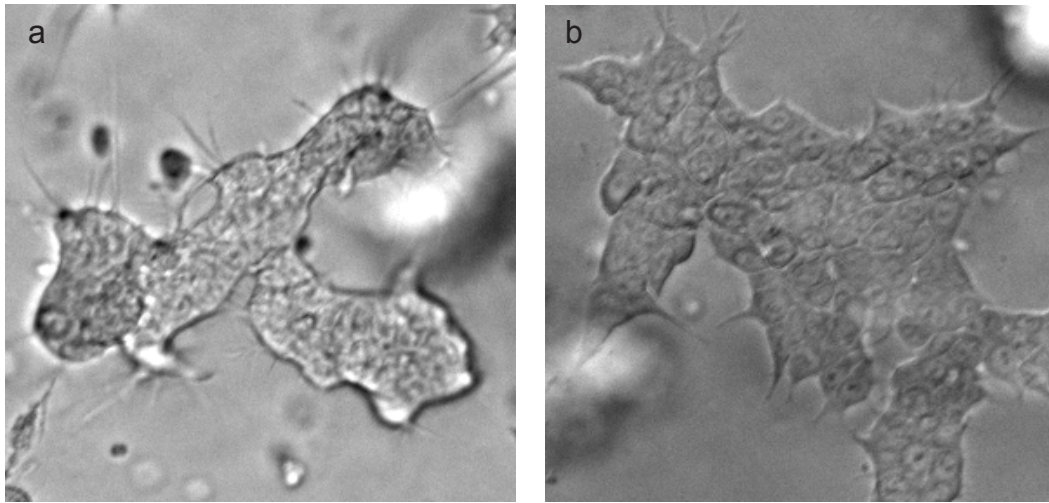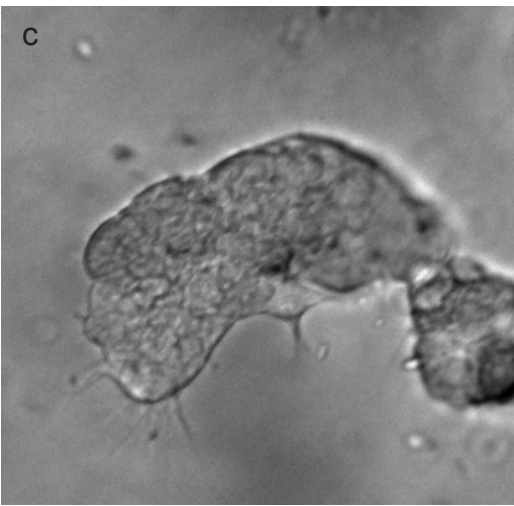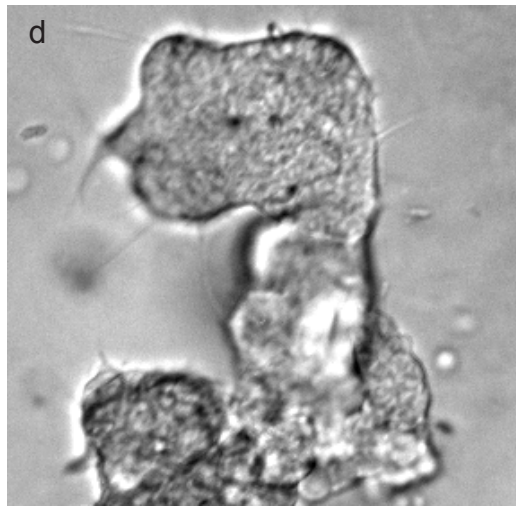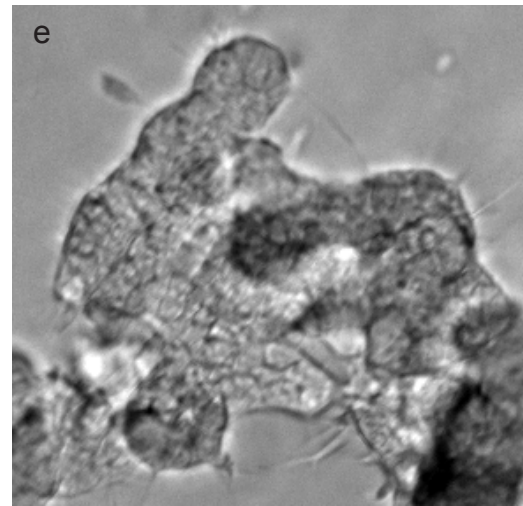

**Supplemental Figure 1: Disc colonies are not a result of cells sitting on the bottom of the well.**

A) Phase images of HCT-116 cells grown in 3-D matrigel on different surfaces; a: non-coated plastic; b: non-coated plastic, cells sitting on the bottom of the plate; c: polyHEMA coated plastic; d: matrigel coated plastic; e: glass cover slip with RNEW media.
